# Supplementary material for: Deciphering the tRNA-derived small RNAs: origin, development, and future
Source: PubMed Central journal article supplement (PMC8692627; doi:10.1038/s41419-021-04472-3), 2021-12-21
Supplement: 41419_2021_4472_MOESM2_ESM.pdf [file 41419_2021_4472_MOESM2_ESM.pdf]

**tsRNA databases  
database**

**Note**

tRFexplorer[140]

Contains tsRNA expression profiles in all cell lines in NCI-60 as well as in all TCGA tumor types

MINTbase v2.0[48]

Comprehensive tRF database containing nuclear and mitochondrial fragments of different cancer gene maps

MINTmap[141]

Rapid and accurate analysis and quantification of tRFs in RNA-Seq databases

BBCancer[142]

It is an open database providing the expression of 6 types of RNA in blood samples from patients with various cancer types

OncotRF[143]

A comprehensive database exploring the function of tRFs in human cancers and identifying diagnostic and prognostic biomarkers of cancer

TsRBase[144]

A comprehensive database for querying tsRNA expression and function in a wide range of species

## **URL link**

<https://trfexplorer.cloud/>

<http://cm.jefferson.edu/MINTbase/>

<https://github.com/TJU-CMC-Org/MINTmap/>

<http://bbcancer.renlab.org/>

<http://bioinformatics.zju.edu.cn/OncotRF>

[http://www.tsrbase.org.](http://www.tsrbase.org)
