# Supplementary material for: Deciphering the tRNA-derived small RNAs: origin, development, and future
Source: PubMed Central journal article supplement (PMC8692627; doi:10.1038/s41419-021-04472-3), 2021-12-21
Supplement: 41419_2021_4472_MOESM3_ESM.pdf [file 41419_2021_4472_MOESM3_ESM.pdf]

| <b>Full name</b>                                   | <b>abbreviation</b> |
|----------------------------------------------------|---------------------|
| tumor necrosis factor- $\alpha$                    | TNF- $\alpha$       |
| tRNA-derived small RNAs                            | tsRNAs/tDR          |
| tRNA-derived fragments                             | tRFs                |
| tRNA halves/tRNA-derived stress-inducible RNAs     | tiRNAs              |
| triple negative breast cancer                      | TNBC                |
| transfer RNA                                       | tRNA                |
| the Janus kinase                                   | JAK                 |
| terminal oligoguanine                              | TOG                 |
| Systemic lupus erythematosus                       | SLE                 |
| stress granules                                    | SGs                 |
| snoRNAs-derived fragments                          | sdRNAs              |
| small nucleolar RNAs                               | snoRNAs             |
| small nuclear RNAs                                 | snRNAs              |
| small non-coding RNAs                              | SncRNAs             |
| small interfering RNAs                             | siRNAs              |
| extracellular signal-regulated kinase 1/2          | ERK1/2              |
| signal transducer and activator of transcription 3 | STAT3               |
| sex hormone-dependent tRNA-derived RNAs            | SHOT-RNAs           |
| Protein Kinase B                                   | Akt                 |
| RNA binding proteins                               | RBP <sub>s</sub>    |
| rRNAs-derived RNA fragments                        | rRFs                |
| ribosomal RNAs                                     | rRNAs               |
| Ribosomal protein S28                              | RPS28               |
| prostate cancer                                    | PCa                 |
| precursor tRNAs                                    | pre-tRNAs           |
| polynucleotide phosphorylase                       | PNPASE              |
| Poly(A)-binding protein-1                          | PABPC1              |
| PIWI-interacting RNAs                              | piRNAs              |
| phosphatidylinositol 3 kinase                      | PI3K                |
| oxidative phosphorylation                          | OXPPOS              |
| nucleotide                                         | nt                  |
| Nucleolin                                          | NCL                 |
| nuclear transcription factor-kappa B               | NF-kB               |
| non-coding RNAs                                    | ncRNAs              |
| microRNAs                                          | miRNAs              |
| long noncoding RNAs                                | lncRNAs             |
| large tumor suppressor kinase 2                    | LATS2               |
| lactate dehydrogenase                              | LDH                 |
| lactate                                            | LA                  |
| interleukin 6                                      | IL-6                |
| interleukin 1 beta                                 | IL-1 $\beta$        |
| high-fat diet                                      | HFD                 |
| glucose-6-phosphatase                              | G6PC                |
| extracellular vesicles                             | EVs                 |
| Estrogen receptor                                  | ER                  |
| epithelial mesenchymal transition                  | EMT                 |

|                                                     |          |
|-----------------------------------------------------|----------|
| endonuclease Z                                      | RNaseZ   |
| endonuclease P                                      | RNaseP   |
| early breast cancer                                 | EBC      |
| cytoplasmic homologous ribonuclease Z2              | ELAC2    |
| cytochrome c                                        | Cytc     |
| colorectal cancer                                   | CRC      |
| circular RNAs                                       | circRNAs |
| bone marrow mesenchymal cells                       | MSC      |
| Argonaute                                           | AGO      |
| angiopoietin                                        | ANG      |
| AlkB homolog 3                                      | ALKBH3   |
| alcoholic fatty liver disease                       | AFLD     |
| 3' untranslated region                              | 3'UTR    |
| cancer stem cell                                    | CSC      |
| tumor necrosis factor receptor superfamily member 1 | TNFRSF1A |
